# Supplementary material
Source: Springer Nature journal article supplement (https://www.springermedizin.de/resource/supplementary/12985_2013_2255_MOESM5_ESM.pdf/9606342)

**A****MV infection**

control

CD

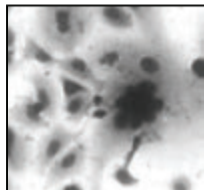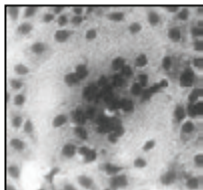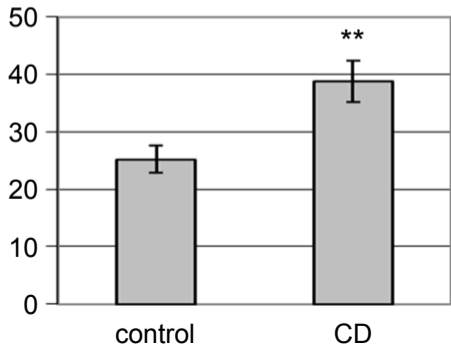**B****H/F coexpression**

control

CD

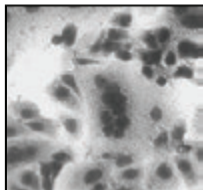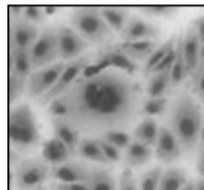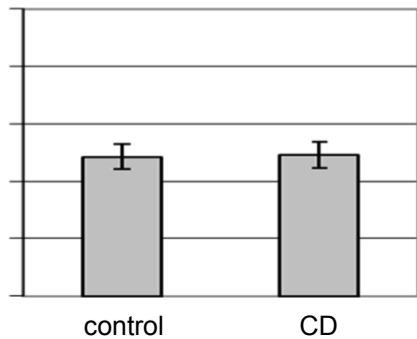

Supplement: MOESM5 [file 9606342]
